# Supplementary material
Source: Research Square preprint supplement (doi:10.21203/rs.3.rs-9003942/v1)
Supplement: Supplementary file 1 [file 7a070389b863704fd6865e9f.docx]

**Supplementary Figures and Tables**

**Road Type and Urbanization Effects on Roadside Plant Diversity along a Rural‒Urban Gradient in Welmara District, Oromia, Ethiopia**

Yohannis Teklu1, 3*, Zerihun Kebebew1, Debissa Lemessa2, Abebe Nigussie1, Ashenafi Miresa4

1Department of Natural Resource Management, College of Agriculture and Veterinary Medicine, Jimma University, Ethiopia

2Department of Plant Biology and Biodiversity Management, Faculty of Natural Science, Addis Ababa University, Ethiopia

3Department of Biology, Faculty of Natural Science, Gambella University, Ethiopia

4Department of Animal Science, College of Agriculture and Veterinary Medicine, Jimma University, Ethiopia

Corresponding author: [joye911@gmail.com](mailto:joye911@gmail.com)

**Figure S1**. Effect of urbanization and road type on the above ground plant community metrics (exotic cover, herb cover and species richness)


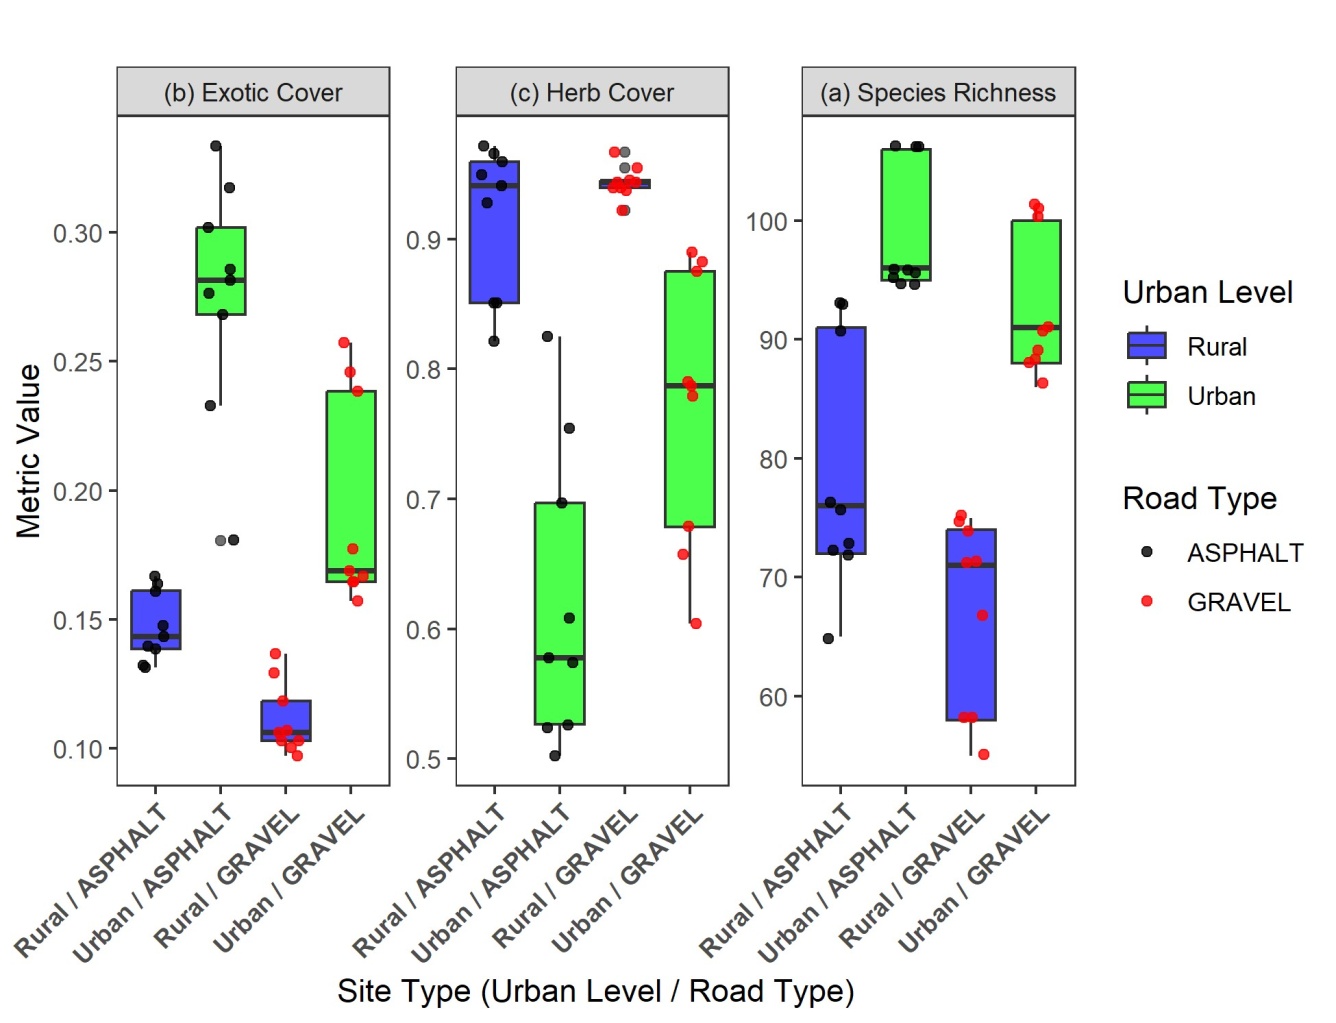


**Figure S2.** Soil seed bank metrics (exotic cover, herb cover and species richness) across the descriptive factors such as urban level (urban and rural), distance range from the roads edge (0-10 m, 10-20 m, and 20-30 m, as well as road types (asphalt and gravel)


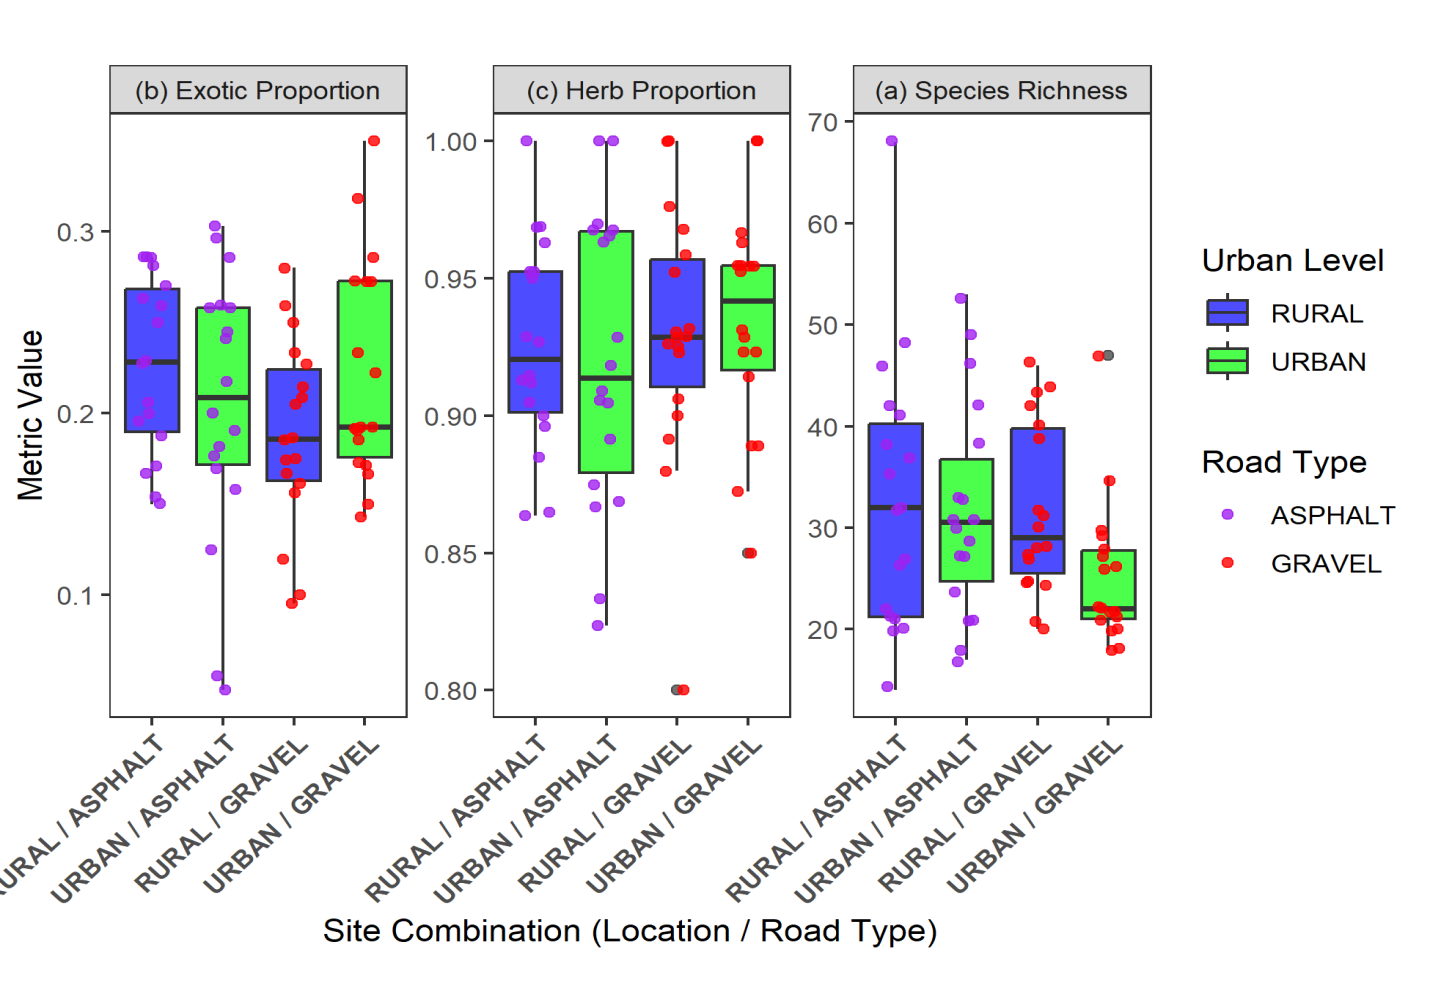


**Figure S3**. NMDS ordination of soil seed bank species composition across the descriptive factors such as urban level (urban and rural, distance range from the roads edge (0-10 m, 10-20 m, and 20-30 m, as well as road types (asphalt and gravel)


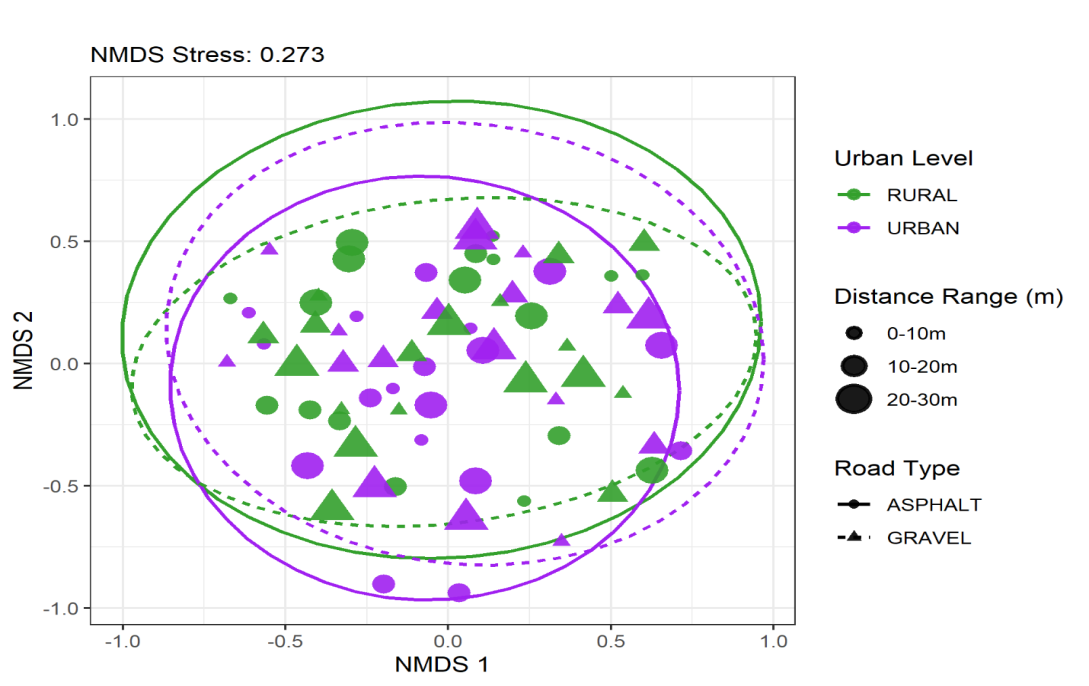


**Table S1.** Sørensen's dissimilarity index results for both the aboveground vegetation and soil seed bank flora comparing between the metrics (urban Versus rural, asphalt Versus Gravel, 0-10m Versus 10-20 m, 0-10 m Versus 20-30 m, and 10-20 m Versus 20-30 m).

| **Above ground vegetation** | | | **Soil seed bank** | |
| --- | --- | --- | --- | --- |
| Comparison | Sørensen's Dissimilarity (β) | Sørensen's Similarity (1−β) | Sørensen's Dissimilarity (β) | Sørensen's Similarity (1−β) |
| Urban vs. Rural | 0.0383 | 0.9617 | 0.0866 | 0.9134 |
| Asphalt vs. Gravel | 0.0171 | 0.9829 | 0.000 | 100.00 |
| 0-10 m vs. 10-20 m | 0.0584 | 0.9416 | 0.3333 | 0.6667 |
| 0-10 m vs. 20-30 m | 0.0567 | 0.9433 | 0.0968 | 0.9032 |
| 10-20 m vs. 20-30 m | 0.0423 | 0.9577 | 0.4043 | 0.5957 |

**Table S2.** Indicator species analysis for soil seed bank plant species associated with urban level (urban and rural) identified through Indicator Value (IndVal) based on species specificity and fidelity.

| Plant species lists | Max IndVal (A×B) | P-value | Indicated Cluster | Indicated Level |
| --- | --- | --- | --- | --- |
| *Abutilon mauritianum* | 0.19048 | 0.620 | 2 | URBAN |
| *Acacia mearnsii* | 0.10000 | 0.732 | 1 | RURAL |
| *Achyranthes aspera* | 0.27855 | 0.815 | 2 | URBAN |
| *Alchemilla abyssinica* | 0.34987 | 0.500 | 1 | RURAL |
| *Amaranthus spinosus* | 0.37209 | 0.344 | 1 | RURAL |
| *Argemone Mexicana* | 0.09722 | 1.000 | 1 | RURAL |
| *Bidens macroptera* | 0.33396 | 0.805 | 2 | URBAN |
| *Bidens pilosa* | 0.34987 | 0.509 | 2 | URBAN |
| ***Chenopodiastrum.murale*** | **0.24008** | **0.041** | **1** | **RURAL** |
| *Chenopodium.album* | 0.21552 | 1.000 | 1 | RURAL |
| *Chlorophytum.tetraphyllum* | 0.15000 | 0.549 | 1 | RURAL |
| *Commelina.africana* | 0.16005 | 1.000 | 1 | RURAL |
| *Crassocephalum.crepidioides* | 0.11343 | 0.788 | 1 | RURAL |
| *Crassocephalum.picridifolium* | 0.33333 | 1.000 | 1 | RURAL |
| *Crotalaria.agatiflora* | 0.22222 | 1.000 | 1 | RURAL |
| *Croton.macrostachyus* | 0.20940 | 0.804 | 2 | URBAN |
| *Cyclospermum.leptophyllum* | 0.32654 | 1.000 | 2 | URBAN |
| *Cynoglossum.amplifolium* | 0.38580 | 0.320 | 2 | URBAN |
| *Datura.stramonium* | 0.19560 | 0.816 | 1 | RURAL |
| *Dichondra.repens* | 0.26471 | 0.796 | 1 | RURAL |
| *Dichrocephala.integrifolia* | 0.16806 | 0.785 | 1 | RURAL |
| *Digitaria.abyssinica* | 0.35431 | 1.000 | 1 | RURAL |
| *Diplotaxis.erucoides* | 0.18182 | 0.813 | 2 | URBAN |
| *Drymaria.cordata* | 0.35380 | 0.243 | 2 | URBAN |
| ***Dysphania.multifida*** | **0.38281** | **0.035** | **2** | **URBAN** |
| *Euphorbia.hirta* | 0.38580 | 0.349 | 2 | URBAN |
| *Galinsoga.quadriradiata* | 0.19560 | 0.781 | 1 | RURAL |
| *Galium.aparine* | 0.22354 | 0.282 | 1 | RURAL |
| *Geranium.arabicum* | 0.34043 | 1.000 | 1 | RURAL |
| *Guizotia.scabra* | 0.19048 | 0.617 | 2 | URBAN |
| *Haplocarpha.rueppellii* | 0.18673 | 0.389 | 2 | URBAN |
| *Helichrysum.formosissimum* | 0.12698 | 0.780 | 1 | RURAL |
| *Hypoestes.forskaolii* | 0.32791 | 0.610 | 2 | URBAN |
| *Impatiens.ethiopica* | 0.15278 | 1.000 | 1 | RURAL |
| *Juniperus.procera.Hochst..ex.Endl.* | 0.16806 | 0.778 | 1 | RURAL |
| *Kalanchoe.petitiana* | 0.33333 | 1.000 | 1 | RURAL |
| *Kickxia.elatine.subsp..crinita* | 0.14620 | 1.000 | 2 | URBAN |
| *Lamium.amplexicaule* | 0.17391 | 1.000 | 2 | URBAN |
| *Lysimachia.arvensis* | 0.32143 | 0.083 | 2 | URBAN |
| *Medicago.polymorpha* | 0.39457 | 0.206 | 2 | URBAN |
| *Nasturtium.officinale* | 0.16806 | 0.805 | 1 | RURAL |
| *Nicandra.physalodes* | 0.08889 | 0.348 | 1 | RURAL |
| *Oenothera.rosea* | 0.31944 | 1.000 | 1 | RURAL |
| *Oldenlandia.monanthos* | 0.21778 | 0.613 | 1 | RURAL |
| *Olea.europaea.L.* | 0.19048 | 0.605 | 2 | URBAN |
| *Oxalis.corniculata* | 0.32143 | 0.100 | 2 | URBAN |
| *Pavonia.schimperiana* | 0.39457 | 0.230 | 2 | URBAN |
| *Persicaria.nepalensis* | 0.21778 | 0.629 | 1 | RURAL |
| *Pilea.tetraphylla* | 0.22685 | 0.476 | 1 | RURAL |
| *Plantago.major* | 0.34043 | 1.000 | 1 | RURAL |
| *Poa.annua* | 0.28671 | 0.236 | 2 | URBAN |
| *Polygonum.persicaria* | 0.16667 | 1.000 | 1 | RURAL |
| *Pseudognaphalium.luteoalbum* | 0.18778 | 1.000 | 2 | URBAN |
| *Raphanus.raphanistrum* | 0.26042 | 0.233 | 1 | RURAL |
| *Rumex.nepalensis* | 0.24708 | 0.119 | 1 | RURAL |
| *Snowdenia.polystachya* | 0.22321 | 0.816 | 1 | RURAL |
| *Solanum.anguivi* | 0.19048 | 0.604 | 2 | URBAN |
| *Solanum.coagulans* | 0.32143 | 0.092 | 2 | URBAN |
| *Solanum. incanum* | 0.40821 | 0.219 | 2 | URBAN |
| *Solanum.nigrum* | 0.21778 | 0.628 | 1 | RURAL |
| *Sonchus.asper* | 0.29878 | 1.000 | 2 | URBAN |
| ***Stellaria.media*** | **0.51914** | **0.008** | **1** | **RURAL** |
| *Tagetes.minuta* | 0.15278 | 1.000 | 1 | RURAL |
| *Taraxacum.officinale* | 0.30030 | 0.608 | 2 | URBAN |
| ***Torilis.arvensis*** | **0.49020** | **0.033** | **1** | **RURAL** |
| *Trifolium.ruppellianum* | 0.24327 | 1.000 | 1 | RURAL |
| *Trifolium.schimperi* | 0.43085 | 0.128 | 2 | URBAN |
| ***Verbascum.sinaiticum*** | **0.47343** | **0.022** | **1** | **RURAL** |
| *Verbena.bonariensis* | 0.32011 | 0.826 | 1 | RURAL |
| *Verbena.officinalis* | 0.17690 | 0.593 | 2 | URBAN |
| *Vernonia.amygdalina* | 0.08681 | 0.708 | 1 | RURAL |
| *Veronica.abyssinica* | 0.41327 | 0.329 | 1 | RURAL |

**Table S3**. Indicator species analysis for soil seed bank plant species associated with distance ranges from the roads edge (0-10 m, 10-20 m, 20-30 m) identified through Indicator Value (IndVal) based on species specificity and fidelity.

| Species | Max IndVal (A×B) | P-value | Indicated Cluster | Indicated Level |
| --- | --- | --- | --- | --- |
| *Abutilon.mauritianum* | 0.16071 | 0.593 | 1 | 0-10' |
| *Acacia.mearnsii* | 0.06667 | 1.000 | 2 | 10-20' |
| *Achyranthes.aspera* | 0.16667 | 1.000 | 1 | 0-10' |
| *Alchemilla.abyssinica* | 0.25397 | 0.619 | 2 | 10-20' |
| *Amaranthus.spinosus* | 0.28004 | 0.402 | 3 | 20-30' |
| *Argemone.mexicana* | 0.10714 | 0.814 | 1 | 0-10' |
| *Bidens.macroptera* | 0.21307 | 1.000 | 1 | 0-10' |
| *Bidens.pilosa* | 0.19444 | 1.000 | 1 | 0-10' |
| *Chenopodiastrum.murale* | 0.14583 | 0.390 | 3 | 20-30' |
| *Chenopodium.album* | 0.17385 | 0.872 | 3 | 20-30' |
| *Chlorophytum.tetraphyllum* | 0.17778 | 0.196 | 3 | 20-30' |
| *Commelina.africana* | 0.19841 | 0.254 | 3 | 20-30' |
| *Crassocephalum.crepidioides* | 0.12500 | 0.463 | 2 | 10-20' |
| *Crassocephalum.picridifolium* | 0.25087 | 0.946 | 2 | 10-20' |
| *Crotalaria.agatiflora* | 0.18750 | 0.875 | 2 | 10-20' |
| *Croton.macrostachyus* | 0.23077 | 0.212 | 2 | 10-20' |
| *Cyclospermum.leptophyllum* | 0.23704 | 0.957 | 2 | 10-20' |
| *Cynoglossum.amplifolium* | 0.26759 | 0.602 | 3 | 20-30' |
| ***Datura.stramonium*** | **0.29340** | **0.025** | **1** | **0-10'** |
| *Dichondra.repens* | 0.24020 | 0.413 | 3 | 20-30' |
| *Dichrocephala.integrifolia* | 0.20833 | 0.187 | 2 | 10-20' |
| *Digitaria.abyssinica* | 0.24575 | 1.000 | 2 | 10-20' |
| *Diplotaxis.erucoides* | 0.18939 | 0.376 | 2 | 10-20' |
| ***Drymaria.cordata*** | **0.35526** | **0.026** | **2** | **10-20'** |
| *Dysphania.multifida* | 0.18750 | 0.871 | 2 | 10-20' |
| *Euphorbia.hirta* | 0.26759 | 0.622 | 3 | 20-30' |
| ***Galinsoga.quadriradiata*** | **0.29340** | **0.032** | **1** | **0-10'** |
| *Galium.aparine* | 0.19841 | 0.255 | 2 | 10-20' |
| *Geranium.arabicum* | 0.22695 | 1.000 | 1 | 0-10' |
| *Guizotia.scabra* | 0.16071 | 0.611 | 2 | 10-20' |
| *Haplocarpha.rueppellii* | 0.14815 | 0.580 | 2 | 10-20' |
| *Helichrysum.formosissimum* | 0.19048 | 0.124 | 3 | 20-30' |
| ***Hypoestes.forskaolii*** | **0.22866** | **0.046** | **1** | **0-10'** |
| *Impatiens.ethiopica* | 0.27273 | 0.046 | 1 | 0-10' |
| *Juniperus.procera.Hochst..ex.Endl.* | 0.20833 | 0.181 | 2 | 10-20' |
| *Kalanchoe.petitiana* | 0.22222 | 1.000 | 1 | 0-10' |
| *Kickxia.elatine.subsp..crinita* | 0.17763 | 0.320 | 2 | 10-20' |
| *Lamium.amplexicaule* | 0.26087 | 0.067 | 2 | 10-20' |
| *Lysimachia.arvensis* | 0.14881 | 1.000 | 3 | 20-30' |
| *Medicago.polymorpha* | 0.24242 | 0.868 | 1 | 0-10' |
| ***Nasturtium.officinale*** | **0.30000** | **0.015** | **1** | **0-10'** |
| *Nicandra.physalodes* | 0.03333 | 1.000 | 1 | 0-10' |
| *Oenothera.rosea* | 0.23188 | 1.000 | 2 | 10-20' |
| *Oldenlandia.monanthos* | 0.20167 | 0.380 | 2 | 10-20' |
| *Olea.europaea.L.* | 0.24008 | 0.107 | 2 | 10-20' |
| *Oxalis.corniculata* | 0.14881 | 1.000 | 3 | 20-30' |
| *Pavonia.schimperiana* | 0.24242 | 0.846 | 1 | 0-10' |
| ***Persicaria.nepalensis*** | **0.28167** | **0.048** | **1** | **0-10'** |
| *Pilea.tetraphylla* | 0.17361 | 0.606 | 2 | 10-20' |
| *Plantago.major* | 0.22695 | 1.000 | 1 | 0-10' |
| *Poa.annua* | 0.18006 | 0.744 | 2 | 10-20' |
| *Polygonum.persicaria* | 0.21007 | 0.252 | 2 | 10-20' |
| *Pseudognaphalium.luteoalbum* | 0.13500 | 1.000 | 2 | 10-20' |
| ***Raphanus.raphanistrum*** | **0.29340** | **0.031** | **1** | **0-10'** |
| *Rumex.nepalensis* | 0.14035 | 0.708 | 2 | 10-20' |
| *Snowdenia.polystachya* | 0.21429 | 0.400 | 2 | 10-20' |
| *Solanum.anguivi* | 0.24008 | 0.098 | 2 | 10-20' |
| *Solanum.coagulans* | 0.14881 | 1.000 | 3 | 20-30' |
| *Solanum.incanum* | 0.23188 | 1.000 | 1 | 0-10' |
| ***Solanum.nigrum*** | **0.28167** | **0.047** | **1** | **0-10'** |
| *Sonchus.asper* | 0.26016 | 0.530 | 2 | 10-20' |
| *Stellaria.media* | 0.23704 | 0.954 | 1 | 0-10' |
| *Tagetes.minuta* | 0.18939 | 0.358 | 3 | 20-30' |
| *Taraxacum.officinale* | 0.28829 | 0.171 | 3 | 20-30' |
| *Torilis.arvensis* | 0.26471 | 0.944 | 3 | 20-30' |
| *Trifolium.ruppellianum* | 0.24747 | 0.326 | 1 | 0-10' |
| *Trifolium.schimperi* | 0.25621 | 0.862 | 2 | 10-20' |
| *Verbascum.sinaiticum* | 0.26178 | 0.728 | 1 | 0-10' |
| *Verbena.bonariensis* | 0.22321 | 0.943 | 1 | 0-10' |
| *Verbena.officinalis* | 0.14035 | 0.703 | 2 | 10-20' |
| *Vernonia.amygdalina* | 0.08333 | 0.731 | 3 | 20-30' |
| *Veronica.abyssinica* | 0.30697 | 0.353 | 3 | 20-30' |

**Table S4.** Indicator species analysis for soil seed bank plant species associated with asphalt and gravel road types, identified through Indicator Value (IndVal) based on species specificity and fidelity.

| Species | Max IndVal (A×B) | P-value | Indicated Cluster | Indicated Level |
| --- | --- | --- | --- | --- |
| ***Abutilon mauritianum*** | **0.33862** | **0.013** | **2** | **GRAVEL** |
| *Acacia mearnsii* | 0.10000 | 0.758 | 2 | GRAVEL |
| *Achyranthes aspera* | 0.37346 | 0.087 | 2 | GRAVEL |
| *Alchemilla abyssinica* | 0.41336 | 0.100 | 2 | GRAVEL |
| *Amaranthus spinosus* | 0.34173 | 0.614 | 2 | GRAVEL |
| *Argemone mexicana* | 0.12698 | 0.777 | 2 | GRAVEL |
| ***Bidens macroptera*** | **0.53093** | **0.002** | **1** | **ASPHALT** |
| *Bidens pilosa* | 0.32011 | 0.822 | 1 | ASPHALT |
| *Chenopodiastrum murale* | 0.16071 | 0.395 | 2 | GRAVEL |
| *Chenopodium album* | 0.21552 | 1.000 | 2 | GRAVEL |
| *Chlorophytum tetraphyllum* | 0.11852 | 1.000 | 2 | GRAVEL |
| *Commelina africana* | 0.16005 | 1.000 | 2 | GRAVEL |
| *Crassocephalum crepidioides* | 0.08333 | 1.000 | 1 | ASPHALT |
| *Crassocephalum picridifolium* | 0.39120 | 0.496 | 1 | ASPHALT |
| *Crotalaria agatiflora* | 0.34722 | 0.093 | 2 | GRAVEL |
| *Croton macrostachyus* | 0.18056 | 1.000 | 1 | ASPHALT |
| ***Cyclospermum leptophyllum*** | **0.45000** | **0.044** | **2** | **GRAVEL** |
| *Cynoglossum amplifolium* | 0.35556 | 0.618 | 2 | GRAVEL |
| *Datura stramonium* | 0.16667 | 1.000 | 1 | ASPHALT |
| *Dichondra repens* | 0.26471 | 0.809 | 2 | GRAVEL |
| *Dichrocephala integrifolia* | 0.16806 | 0.795 | 1 | ASPHALT |
| *Digitaria abyssinica* | 0.38322 | 0.627 | 1 | ASPHALT |
| *Diplotaxis erucoides* | 0.21338 | 0.443 | 2 | GRAVEL |
| *Drymaria cordata* | 0.26389 | 1.000 | 1 | ASPHALT |
| *Dysphania multifida* | 0.25087 | 0.813 | 2 | GRAVEL |
| *Euphorbia hirta* | 0.38580 | 0.310 | 2 | GRAVEL |
| *Galinsoga quadriradiata* | 0.22685 | 0.482 | 2 | GRAVEL |
| *Galium aparine* | 0.22354 | 0.277 | 2 | GRAVEL |
| *Geranium arabicum* | 0.36939 | 0.609 | 1 | ASPHALT |
| *Guizotia scabra* | 0.22354 | 0.316 | 2 | GRAVEL |
| *Haplocarpha rueppellii* | 0.18673 | 0.406 | 1 | ASPHALT |
| ***Helichrysum formosissimum*** | **0.28571** | **0.007** | **2** | **GRAVEL** |
| *Hypoestes forskaolii* | 0.39024 | 0.148 | 2 | GRAVEL |
| *Impatiens ethiopica* | 0.18182 | 0.780 | 1 | ASPHALT |
| *Juniperus procera* Hochst.ex.Endl. | 0.16806 | 0.784 | 1 | ASPHALT |
| *Kalanchoe petitiana* | 0.39120 | 0.463 | 1 | ASPHALT |
| *Kickxia* *elatine*.subsp. *crinita* | 0.24708 | 0.116 | 2 | GRAVEL |
| *Lamium amplexicaule* | 0.20411 | 0.634 | 1 | ASPHALT |
| *Lysimachia arvensis* | 0.25397 | 0.463 | 2 | GRAVEL |
| *Medicago polymorpha* | 0.36364 | 0.473 | 2 | GRAVEL |
| *Nasturtium officinale* | 0.13889 | 1.000 | 1 | ASPHALT |
| *Nicandra physalodes* | 0.05000 | 1.000 | 2 | GRAVEL |
| *Oenothera rosea* | 0.37742 | 0.483 | 1 | ASPHALT |
| ***Oldenlandia monanthos*** | **0.32111** | **0.045** | **2** | **GRAVEL** |
| *Olea europaea L.* | 0.22354 | 0.296 | 1 | ASPHALT |
| *Oxalis corniculata* | 0.25397 | 0.468 | 2 | GRAVEL |
| *Pavonia schimperiana* | 0.36364 | 0.460 | 2 | GRAVEL |
| *Persicaria nepalensis* | 0.18778 | 1.000 | 2 | GRAVEL |
| *Pilea tetraphylla* | 0.22685 | 0.471 | 2 | GRAVEL |
| *Plantago major* | 0.36939 | 0.618 | 1 | ASPHALT |
| *Poa annua* | 0.32143 | 0.092 | 2 | GRAVEL |
| *Polygonum persicaria* | 0.19560 | 0.791 | 1 | ASPHALT |
| *Pseudognaphalium luteoalbum* | 0.28444 | 0.143 | 2 | GRAVEL |
| *Raphanus raphanistrum* | 0.22685 | 0.470 | 2 | GRAVEL |
| *Rumex nepalensis* | 0.17690 | 0.594 | 1 | ASPHALT |
| ***Snowdenia polystachya*** | **0.48016** | **0.001** | **2** | **GRAVEL** |
| *Solanum anguivi* | 0.22354 | 0.313 | 1 | ASPHALT |
| *Solanum coagulans* | 0.25397 | 0.467 | 2 | GRAVEL |
| *Solanum incanum* | 0.37742 | 0.450 | 2 | GRAVEL |
| *Solanum nigrum* | 0.21778 | 0.618 | 2 | GRAVEL |
| *Sonchus asper* | 0.35840 | 0.348 | 2 | GRAVEL |
| *Stellaria media* | 0.35556 | 0.611 | 2 | GRAVEL |
| *Tagetes minuta* | 0.15278 | 1.000 | 1 | ASPHALT |
| *Taraxacum officinale* | 0.36336 | 0.162 | 2 | GRAVEL |
| *Torilis arvensis* | 0.42702 | 0.281 | 1 | ASPHALT |
| *Trifolium ruppellianum* | 0.27273 | 0.672 | 2 | GRAVEL |
| *Trifolium schimperi* | 0.34043 | 1.000 | 1 | ASPHALT |
| *Verbascum sinaiticum* | 0.31944 | 1.000 | 1 | ASPHALT |
| *Verbena bonariensis* | 0.29167 | 1.000 | 1 | ASPHALT |
| *Verbena officinalis* | 0.14620 | 1.000 | 2 | GRAVEL |
| *Vernonia amygdalina* | 0.08681 | 0.691 | 2 | GRAVEL |
| *Veronica abyssinica* | 0.35431 | 1.000 | 1 | ASPHALT |

**Table S5**. The soil seed bank significant indicator plant species associated with urban and rural locations, identified through Indicator Value (IndVal) analysis based on species specificity and fidelity.

| **Species** | **Associated Group** | **Indicator Value (IndVal)** | **Probability (p)** |
| --- | --- | --- | --- |
| **Urban Indicators (Cluster 1)** |  |  |  |
| *Veronica persica* | Urban | 0.7826 | 0.001 |
| *Plantago major* L. | Urban | 0.7500 | 0.001 |
| *Pilea tetraphylla* (Steud.) Blume | Urban | 0.6667 | 0.001 |
| *Sonchus asper* | Urban | 0.6667 | 0.001 |
| *Verbena bonariensis* L. | Urban | 0.6667 | 0.001 |
| *Chenopodiastrum murale* L | Urban | 0.6000 | 0.019 |
| *Bidens pilosa* L. | Urban | 0.5333 | 0.010 |
| **Rural Indicators (Cluster 2)** |  |  |  |
| *Crepis tenerrima* | Rural | 0.9000 | 0.001 |
| *Gymnosporia arbutifolia* subsp *Sidamoensis* | Rural | 0.8571 | 0.001 |
| *Astragalus atropilosulus* | Rural | 0.8333 | 0.001 |
| *Carissa edulis* | Rural | 0.8333 | 0.001 |
| *Dysphania multifida* L. | Rural | 0.7500 | 0.001 |
| *Pseudognaphalium luteoalbum* | Rural | 0.7500 | 0.001 |
| *Sida schimperiana* | Rural | 0.7500 | 0.001 |
| *Rumex nepalensis* | Rural | 0.6944 | 0.002 |
| *Amaranthus spinosus* | Rural | 0.6667 | 0.001 |
| *Dichantium annulatum* | Rural | 0.6667 | 0.001 |
| *Discopodium penninervium* | Rural | 0.6667 | 0.001 |
| *Galium aparine* | Rural | 0.6667 | 0.002 |
| *Maesa lanceolata* Forssk. | Rural | 0.6667 | 0.001 |
| *Pavonia schimperiana* Hochst. | Rural | 0.6667 | 0.004 |
| *Periploca graeca* L. | Rural | 0.6667 | 0.001 |
| *Plantago lanceolata* L. | Rural | 0.6667 | 0.002 |
| *Rosa abyssinica* | Rural | 0.6667 | 0.002 |
| *Vernonia amygdalina* | Rural | 0.6250 | 0.002 |
| *Cynodon dactylon* | Rural | 0.6000 | 0.024 |
| *Digitaria abyssinica* | Rural | 0.6000 | 0.028 |
| *Echinops longisetus* | Rural | 0.6000 | 0.018 |
| *Chlorophytum tetraphyllum* L.f. Baker | Rural | 0.5952 | 0.008 |
| *Croton macrostachyus* | Rural | 0.5952 | 0.007 |
| *Dodonaea viscosa subsp. angustifolia* | Rural | 0.5952 | 0.013 |
| *Dovyalis abyssinica* | Rural | 0.5952 | 0.005 |
| *Helichrysum formosissimum* Sch.Bip. | Rural | 0.5952 | 0.006 |
| *Pennisetum clandestinum* | Rural | 0.5952 | 0.003 |
| *Setaria acromelacea* | Rural | 0.5952 | 0.007 |
| *Urtica simensis* | Rural | 0.5952 | 0.004 |
| *Bersama abyssinica* Fresen | Rural | 0.5333 | 0.007 |
| *Cyperus rotundus* L. | Rural | 0.5333 | 0.006 |
| *Hygrophila auriculata* (Schumach.) Heine | Rural | 0.5333 | 0.004 |
| *Justicia schimperiana* (Hochst. ex Nees.) | Rural | 0.5333 | 0.003 |
| *Grewia ferruginea* | Rural | 0.5000 | 0.002 |
| *Orobanche minor* | Rural | 0.5000 | 0.001 |
| *Kalanchoe petitiana* A.Rich | Rural | 0.4444 | 0.003 |
| *Pulicaria undulate* | Rural | 0.3333 | 0.016 |

**Table S6.** The lists of plant species that used as significant indicators for specific distance ranges (0–10 m, 10–20 m, and 20–30 m) from the road edge, showing their associated group and probability (p) values.

| **Species** | **Associated Group** | **Indicator Value (IndVal)** | **Probability (p)** |
| --- | --- | --- | --- |
| **0-10m Indicators (Cluster 1)** |  |  |  |
| *Solanecio gigas* (Vatke) C. Jeffrey | 0-10m | 0.7500 | 0.001 |
| *Buddleja polystachya* Fresen | 0-10m | 0.6136 | 0.001 |
| *Eucalyptus globulus* Labill. | 0-10m | 0.5625 | 0.001 |
| *Alchemilla abyssinica* Fresen | 0-10m | 0.4444 | 0.035 |
| *Datura stramonium* L. | 0-10m | 0.4444 | 0.034 |
| *Dichantium annulatum* | 0-10m | 0.4444 | 0.033 |
| *Haplocarpha rueppellii* (Sch.Bip.) | 0-10m | 0.4444 | 0.045 |
| *Pavonia schimperiana* Hochst. | 0-10m | 0.4444 | 0.039 |
| *Urochloa trichopus* Hochst. | 0-10m | 0.4444 | 0.038 |
| **10-20m Indicators (Cluster 2)** |  |  |  |
| *Galium aparine* | 10-20m | 0.4444 | 0.042 |
| *Plantago lanceolata* L. | 10-20m | 0.4444 | 0.040 |
| *Rumex nervosus* | 10-20m | 0.4444 | 0.042 |
| *Sonchus asper* | 10-20m | 0.4444 | 0.034 |
| *Verbena bonariensis* L. | 10-20m | 0.4444 | 0.048 |
| **20-30m Indicators (Cluster 3)** |  |  |  |
| *Laggera tomentosa Sch.* | 20-30m | 0.8000 | 0.001 |
| *Oxalis corniculata* | 20-30m | 0.7500 | 0.001 |
| *Raphanus raphanistrum* | 20-30m | 0.7500 | 0.001 |
| *Carduus macracanthus* | 20-30m | 0.5714 | 0.002 |
| *Cyperus sesquiflorus subsp. cylindricus* | 20-30m | 0.5000 | 0.006 |
| *Nicandra physalodes L. Gaertn.* | 20-30m | 0.5000 | 0.008 |
| *Plantago major L.* | 20-30m | 0.5000 | 0.003 |
| *Achyranthes aspera* | 20-30m | 0.4615 | 0.027 |
| *Hygrophila auriculata (Schumach.) Heine* | 20-30m | 0.4500 | 0.020 |
| *Amaranthus spinosus* | 20-30m | 0.4444 | 0.041 |
| *Zehneria scabra* | 20-30m | 0.4386 | 0.032 |

**Table S7**. The above ground vegetation indicator plant species associated with asphalt and gravel road, identified through Indicator Value (IndVal) analysis based on species specificity and fidelity.

| **Species** | **Associated Group** | **Indicator Value (IndVal)** | **Probability (p)** |
| --- | --- | --- | --- |
| **ASPHALT Indicators (Cluster 1)** |  |  |  |
| *Crassocephalum picridifolium (DC.)* | Asphalt | 0.6944 | 0.001 |
| *Veronica abyssinica* | Asphalt | 0.6422 | 0.002 |
| *Achyranthes aspera* | Asphalt | 0.6175 | 0.008 |
| *Carduus marianus L* | Asphalt | 0.6000 | 0.031 |
| *Digitaria abyssinica* | Asphalt | 0.6000 | 0.022 |
| *Drymaria cordata* | Asphalt | 0.6000 | 0.021 |
| *Croton macrostachyus* | Asphalt | 0.5952 | 0.004 |
| *Dovyalis abyssinica* | Asphalt | 0.5952 | 0.008 |
| *Pennisetum clandestinum* | Asphalt | 0.5952 | 0.008 |
| *Setaria acromelacea* | Asphalt | 0.5952 | 0.004 |
| *Stellaria media* | Asphalt | 0.5952 | 0.003 |
| *Urtica simensis* | Asphalt | 0.5952 | 0.005 |
| *Hygrophila auriculata (Schumach.) Heine* | Asphalt | 0.5333 | 0.007 |
| *Pulicaria undulate* | Asphalt | 0.3333 | 0.023 |
| **GRAVEL Indicators (Cluster 2)** |  |  |  |
| *Acacia mearnsii* | Gravel | 0.8333 | 0.001 |
| *Chenopodiastrum murale* L | Gravel | 0.6000 | 0.020 |
| *Bellardia trixago* L | Gravel | 0.5333 | 0.006 |
| *Polypogon monspeliensis* | Gravel | 0.5000 | 0.001 |

**Table S8**. Frequency of occurrence of species recorded in the aboveground vegetation and soil seed bank in along the asphalt and gravel roads.

| **S/N** | **Aboveground Species recorded** | | | **Soil seed bank** | | |
| --- | --- | --- | --- | --- | --- | --- |
|  | Frequency | Percentage |  | Frequency | Percentage |
| 1 | *Abutilon mauritianum* | 12 | 33.33 | *Abutilon mauritianum* | 21 | 29.16667 |
| 2 | *Acacia mearnsii* | 15 | 41.67 | *Acacia mearnsii* | 10 | 13.88889 |
| 3 | *Achyranthes aspera* | 26 | 72.22 | *Achyranthes aspera* | 36 | 50 |
| 4 | *Afrocarduus schimperi Sch_Bip* | 21 | 58.33 | *Alchemilla abyssinica* | 42 | 58.33333 |
| 5 | *Alchemilla abyssinica Fresen* | 27 | 75 | *Amaranthus spinosus* | 43 | 59.72222 |
| 6 | *Amaranthus_spinosus* | 27 | 75 | *Argemone mexicana* | 14 | 19.44444 |
| 7 | *Argemone Mexicana* | 29 | 80.56 | *Bidens macroptera* | 44 | 61.11111 |
| 8 | *Astragalus_atropilosulus* | 15 | 41.67 | *Bidens pilosa* | 42 | 58.33333 |
| 9 | *Bellardia_trixago_L* | 15 | 41.67 | *Chenopodiastrum murale* | 14 | 19.44444 |
| 10 | *Bersama_abyssinica_Fresen* | 15 | 41.67 | *Chenopodium album* | 29 | 40.27778 |
| 11 | *Bidens_macroptera* | 33 | 91.67 | *Chlorophytum tetraphyllum* | 15 | 20.83333 |
| 12 | *Bidens_pilosa_L_* | 15 | 41.67 | *Commelina africana* | 21 | 29.16667 |
| 13 | *Buddleja_polystachya_Fresen* | 11 | 30.56 | *Crassocephalum crepidioides* | 12 | 16.66667 |
| 14 | *Carduus_macracanthus* | 21 | 58.33 | *Crassocephalum picridifolium* | 48 | 66.66667 |
| 15 | *Carduus_marianus_L* | 30 | 83.33 | *Crotalaria agatiflora* | 32 | 44.44444 |
| 16 | *Carduus_pycnocephalus* | 32 | 88.89 | *Croton macrostachyus* | 26 | 36.11111 |
| 17 | *Carissa_edulis* | 15 | 41.67 | *Cyclospermum leptophyllum* | 45 | 62.5 |
| 18 | *Chenopodiastrum_murale_L* | 30 | 83.33 | *Cynoglossum amplifolium* | 45 | 62.5 |
| 19 | *Chenopodium_album_L* | 21 | 58.33 | *Datura stramonium* | 24 | 33.33333 |
| 20 | *Chlorophytum_tetraphyllum_L_fBaker* | 21 | 58.33 | *Dichondra repens* | 34 | 47.22222 |
| 21 | *Cirsium_vulgare_subsp_vulgare* | 27 | 75 | *Dichrocephala integrifolia* | 20 | 27.77778 |
| 22 | *Cirsium_englerianum_* | 33 | 91.67 | *Digitaria abyssinica* | 49 | 68.05556 |
| 23 | *Coleus_lanuginosus_Hochst_ex_Benth_* | 36 | 100 | *Diplotaxis erucoides* | 22 | 30.55556 |
| 24 | *Commelina_africana_L_* | 36 | 100 | *Drymaria cordata* | 38 | 52.77778 |
| 25 | *Commelina_benghalensis* | 36 | 100 | *Dysphania multifida* | 32 | 44.44444 |
| 26 | *Crassocephalum_crepidioides* | 24 | 66.67 | *Euphorbia hirta* | 45 | 62.5 |
| 27 | *Crassocephalum_picridifolium_(DC_)* | 18 | 50 | *Galinsoga quadriradiata* | 24 | 33.33333 |
| 28 | *Crassocephalum_vitellinum* | 18 | 50 | *Galium aparine* | 21 | 29.16667 |
| 29 | *Crepis_tenerrima* | 20 | 55.56 | *Geranium arabicum* | 47 | 65.27778 |
| 30 | *Crotalaria_agatiflora_Schweinf_* | 27 | 75 | *Guizotia scabra* | 21 | 29.16667 |
| 31 | *Crotalaria_incana_L* | 12 | 33.33 | *Haplocarpha rueppellii* | 18 | 25 |
| 32 | *Croton_macrostachyus* | 21 | 58.33 | *Helichrysum formosissimum* | 14 | 19.44444 |
| 33 | *Cupressus_lusitanica* | 18 | 50 | *Hypoestes forskaolii* | 41 | 56.94444 |
| 34 | *Cyclospermum_leptophyllum* | 36 | 100 | *Impatiens ethiopica* | 22 | 30.55556 |
| 35 | *Cynodon dactylon* | 30 | 83.33 | *Juniperus procera Hochst. ex Endl.* | 20 | 27.77778 |
| 36 | *Cynoglossum_amplifolium_Hochst_ex_* | 12 | 33.33 | *Kalanchoe petitiana* | 48 | 66.66667 |
| 37 | *Cyperus_mindorensis_Steud_* | 24 | 66.67 | *Kickxia elatine subsp. crinita* | 19 | 26.38889 |
| 38 | *Cyperus_rotundus_L_* | 15 | 41.67 | *Lamium amplexicaule* | 23 | 31.94444 |
| 39 | *Cyperus_sesquiflorus_subsp_cylindricus* | 24 | 66.67 | *Lysimachia arvensis* | 28 | 38.88889 |
| 40 | *Datura_stramonium_L_* | 27 | 75 | *Medicago polymorpha* | 44 | 61.11111 |
| 41 | *Dichantium_annulatum_* | 27 | 75 | *Nasturtium officinale* | 20 | 27.77778 |
| 42 | *Dichrocephala_integrifolia* | 18 | 50 | *Nicandra physalodes* | 5 | 6.944444 |
| 43 | *Dichondra_repens_J_R_&_G_Forst_* | 24 | 66.67 | *Oenothera rosea* | 46 | 63.88889 |
| 44 | *Digitaria_abyssinica* | 30 | 83.33 | *Oldenlandia monanthos* | 25 | 34.72222 |
| 45 | *Diplotaxis_erucoides_L_DC_* | 14 | 38.89 | *Olea europaea L.* | 21 | 29.16667 |
| 46 | *Discopodium_penninervium* | 27 | 75 | *Oxalis corniculata* | 28 | 38.88889 |
| 47 | *Dodonaea_viscosa_subsp_angustifolia* | 21 | 58.33 | *Pavonia schimperiana* | 44 | 61.11111 |
| 48 | *Dovyalis_abyssinica* | 21 | 58.33 | *Persicaria nepalensis* | 25 | 34.72222 |
| 49 | *Drymaria_cordata_* | 30 | 83.33 | *Pilea tetraphylla* | 24 | 33.33333 |
| 50 | *Dysphania_multifida_L_* | 24 | 66.67 | *Plantago major* | 47 | 65.27778 |
| 51 | *Echinops_ellenbeckii* | 33 | 91.67 | *Poa annua* | 28 | 38.88889 |
| 52 | *Echinops_longisetus* | 30 | 83.33 | *Polygonum persicaria* | 24 | 33.33333 |
| 53 | *Eucalyptus_globulus_Labill_* | 12 | 33.33 | *Pseudognaphalium luteoalbum* | 25 | 34.72222 |
| 54 | *Euphorbia_hirta_L_* | 36 | 100 | *Raphanus raphanistrum* | 24 | 33.33333 |
| 55 | *Galinsoga_quadriradiata_Ruiz_&_Pav* | 33 | 91.67 | *Rumex nepalensis* | 19 | 26.38889 |
| 56 | *Galium_aparine* | 27 | 75 | *Snowdenia polystachya* | 28 | 38.88889 |
| 57 | *Geranium_arabicum_Forssk_* | 36 | 100 | *Solanum anguivi* | 21 | 29.16667 |
| 58 | *Grewia_ferruginea* | 9 | 25 | *Solanum coagulans* | 28 | 38.88889 |
| 59 | *Guizotia_scabra_Vis_Chiov_* | 36 | 100 | *Solanum incanum* | 46 | 63.88889 |
| 60 | *Gymnosporia_arbutifolia_subsp_sidamoensis* | 21 | 58.33 | *Solanum nigrum* | 25 | 34.72222 |
| 61 | *Haplocarpha_rueppellii_(Sch_Bip_)* | 27 | 75 | *Sonchus asper* | 41 | 56.94444 |
| 62 | *Helichrysum_formosissimum_Sch_Bip__* | 21 | 58.33 | *Stellaria media* | 45 | 62.5 |
| 63 | *Hygrophila_auriculata_(Schumach_) Heine* | 15 | 41.67 | *Tagetes minuta* | 22 | 30.55556 |
| 64 | *Hypochaeris_robertia_* | 9 | 25 | *Taraxacum officinale* | 37 | 51.38889 |
| 65 | *Hypoestes_forskaolii_Vahl_R_Br_* | 36 | 100 | *Torilis arvensis* | 51 | 70.83333 |
| 66 | *Impatience_ethiopica_* | 12 | 33.33 | *Trifolium ruppellianum* | 33 | 45.83333 |
| 67 | *Juniperus_procera_Hochst_ex_Endl_* | 18 | 50 | *Trifolium schimperi* | 47 | 65.27778 |
| 68 | *Justicia_diclipteroides_subsp_aethiopica* | 36 | 100 | *Verbascum sinaiticum* | 46 | 63.88889 |
| 69 | *Justicia_schimperiana_(Hochst_ex_Nees)* | 15 | 41.67 | *Verbena bonariensis* | 42 | 58.33333 |
| 70 | *Kalanchoe_petitiana_A_Rich* | 8 | 22.22 | *Verbena officinalis* | 19 | 26.38889 |
| 71 | *kickxia_elatine_subsp_crinita* | 18 | 50 | *Vernonia amygdalina* | 8 | 11.11111 |
| 72 | *Lagenaria_siceraria_* | 6 | 16.67 | *Veronica abyssinica* | 49 | 68.05556 |
| 73 | *Laggera_alata_* | 18 | 50 |  |  |  |
| 74 | *Laggera_tomentosa_Sch_* | 15 | 41.67 |  |  |  |
| 75 | *Leonotis_raineriana_Vis_* | 9 | 25 |  |  |  |
| 76 | *Lippia_abyssinica* | 6 | 16.67 |  |  |  |
| 77 | *Lysimachia_(Anagallis)_arvensis_* | 18 | 50 |  |  |  |
| 78 | *Maesa_lanceolata_Forssk_* | 12 | 33.33 |  |  |  |
| 79 | *Medicago_polymorpha_L_* | 36 | 100 |  |  |  |
| 80 | *Nasturtium_officinale_W_T_Aiton_* | 15 | 41.67 |  |  |  |
| 81 | *Nicandra_physalodes_L_Gaertn_* | 24 | 66.67 |  |  |  |
| 82 | *Nicotiana_tabacum_* | 24 | 66.67 |  |  |  |
| 83 | *Notobasis_syriaca_L_Cass_* | 36 | 100 |  |  |  |
| 84 | *Oenothera_rosea_L'Hér_ex_Aiton* | 36 | 100 |  |  |  |
| 85 | *Oldenlandia_monanthos_Hochst_ex* | 9 | 25 |  |  |  |
| 86 | *Olea_europaea_L_* | 3 | 8.33 |  |  |  |
| 87 | *Orobanche_minor* | 9 | 25 |  |  |  |
| 88 | *Oxalis_corniculata_* | 9 | 25 |  |  |  |
| 89 | *Pavonia_schimperiana_Hochst_* | 27 | 75 |  |  |  |
| 90 | *Pennisetum_clandestinum_* | 21 | 58.33 |  |  |  |
| 91 | *Pennisetum_thunbergii* | 18 | 50 |  |  |  |
| 92 | *Pennisetum_villosum_Fresen* | 33 | 91.67 |  |  |  |
| 93 | *Periploca_graeca_L_* | 12 | 33.33 |  |  |  |
| 94 | *Persicaria_nepalensis* | 36 | 100 |  |  |  |
| 95 | *Physalis_peruviana_* | 36 | 100 |  |  |  |
| 96 | *Phytolacca_dodecandra* | 12 | 33.33 |  |  |  |
| 97 | *Pilea_tetraphylla_(Steud_)_Blume* | 12 | 33.33 |  |  |  |
| 98 | *Plantago_lanceolata_L_* | 27 | 75 |  |  |  |
| 99 | *Plantago_major_L_* | 24 | 66.67 |  |  |  |
| 100 | *Poa_annua_L_* | 18 | 50 |  |  |  |
| 101 | *Polygonum_aviculare_L_* | 18 | 50 |  |  |  |
| 102 | *Polygonum_persicaria_* | 12 | 33.33 |  |  |  |
| 103 | *Polypogon_monspeliensis_* | 9 | 25 |  |  |  |
| 104 | *Pseudognaphalium_luteoalbum_* | 24 | 66.67 |  |  |  |
| 105 | *Pulicaria_undulata* | 6 | 16.67 |  |  |  |
| 106 | *Raphanus_raphanistrum_* | 9 | 25 |  |  |  |
| 107 | *Ricinus_communis_L_* | 6 | 16.67 |  |  |  |
| 108 | *Rosa_abyssinica* | 27 | 75 |  |  |  |
| 109 | *Rubus_apetalus_Pior_* | 3 | 8.33 |  |  |  |
| 110 | *Rumex_abyssinicus* | 30 | 83.33 |  |  |  |
| 111 | *Rumex_nepalensis* | 18 | 50 |  |  |  |
| 112 | *Rumex_nervosus* | 27 | 75 |  |  |  |
| 113 | *Senna_* *didymobotrya* | 6 | 16.67 |  |  |  |
| 114 | *Setaria_acromelacea* | 21 | 58.33 |  |  |  |
| 115 | *Sida_schimperiana_* | 24 | 66.67 |  |  |  |
| 116 | *Solanecio_gigas_Vatke_C_Jeffrey* | 9 | 25 |  |  |  |
| 117 | *Solanum_anguivi_Lam_* | 24 | 66.67 |  |  |  |
| 118 | *Solanum_coagulans_Forssk_* | 18 | 50 |  |  |  |
| 119 | *Solanum_marginatum* | 20 | 55.56 |  |  |  |
| 120 | *Solanum_nigrum* | 33 | 91.67 |  |  |  |
| 121 | *Sonchus_asper* | 27 | 75 |  |  |  |
| 122 | *Stellaria_media_* | 21 | 58.33 |  |  |  |
| 123 | *Stephania_abyssinica_Dillon_ex_A_Rich_Walp* | 32 | 88.89 |  |  |  |
| 124 | *Tagetes_minuta_L_* | 12 | 33.33 |  |  |  |
| 125 | *Taraxacum_officinale_* | 33 | 91.67 |  |  |  |
| 126 | *Torilis_arvensis* | 18 | 50 |  |  |  |
| 127 | *Trifolium_schimperi_A_Rich_* | 33 | 91.67 |  |  |  |
| 128 | *Urochloa_trichopus_Hochst_* | 27 | 75 |  |  |  |
| 129 | *Urtica_simensis* | 21 | 58.33 |  |  |  |
| 130 | *Vachellia_abyssinica* | 26 | 72.22 |  |  |  |
| 131 | *Verbascum_sinaiticum_Benth* | 33 | 91.67 |  |  |  |
| 132 | *Verbena_bonariensis_L_* | 27 | 75 |  |  |  |
| 133 | *Vernonia_amygdalina* | 20 | 55.56 |  |  |  |
| 134 | *Vernonia_brachycalyx_O_Hoffm_* | 25 | 69.44 |  |  |  |
| 135 | *Veronica_abyssinica_* | 25 | 69.44 |  |  |  |
| 136 | *Veronica_anagallis-aquatica_* | 34 | 94.44 |  |  |  |
| 137 | *Veronica_persica_* | 23 | 63.89 |  |  |  |
| 138 | *Xanthium_spinosum_* | 31 | 86.11 |  |  |  |
| 139 | *Zehneria_scabra_* | 19 | 52.78 |  |  |  |
