# Supplementary material
Source: Research Square preprint supplement (doi:10.21203/rs.3.rs-9003942/v1)
Supplement: Supplementary file 2 [file fcee17498f5eeb7b6a2b8c7d.xlsx]

## Sheet: SSB_Summary (2)
Supplementary Material
Road Type and Urbanization Effects on Roadside Plant Diversity along a Rural‒Urban Gradient in Welmara District, Oromia, Ethiopia
Yohannis Teklu*, Zerihun Kebebew, Debissa Lemessa, Abebe Nigussie, Ashenafi Miresa
Table S9.The summary of soil seed bank community metrics (total seedling abundance, species richness, and the proportion of exotic versus native species) along the rural-urban gradients. The study parameters were categorized as urbanization level (urban and rural), road types (asphalt and gravel), and distance from the road edge (0–10 m, 10–20 m, and 20–30 m). Response factors are, distribution o…
Sample site_code	Location_type	RoadType	Distance_m	Total_SSB	Total_Rich	Exotic	Exotic_Prop	Native	Native_Prop	Herb	SHRUB	TREE	Prop_Herb	Prop_Tree	Number of Seedlings	Total Area Sampled per Subplot	Density	Growth form	Status of origin	Plant_Species
UR1P1	URBAN	ASPHALT	0-10'	78	49	12	0.244898	37	0.755102	45	2	2	0.918367	0.0408163	78	0.09	866.667	Herb	Native	Abutilon mauritianum
UR1P1	URBAN	ASPHALT	20-30'	169	46	10	0.217391	36	0.782609	41	2	3	0.891304	0.0652174	169	0.09	1877.78	Herb	Native	Achyranthes aspera
UR1P1	URBAN	ASPHALT	10-20'	111	42	8	0.190476	34	0.809524	39	2	1	0.928571	0.0238095	111	0.09	1233.33	Tree	Native	Acacia mearnsii
UR1P2	URBAN	ASPHALT	20-30'	90	33	6	0.181818	27	0.818182	30	2	1	0.909091	0.030303	90	0.09	1000	Herb	Exotic	Plantago major
UR1P2	URBAN	ASPHALT	0-10'	50	27	7	0.259259	20	0.740741	26	1	0	0.962963	0	50	0.09	555.556	Herb	Native	Alchemilla abyssinica
UR1P2	URBAN	ASPHALT	10-20'	55	27	8	0.296296	19	0.703704	27	0	0	1	0	55	0.09	611.111	Herb	Native	Amaranthus spinosus
UR2P1	URBAN	ASPHALT	10-20'	46	21	1	0.047619	20	0.952381	19	1	1	0.904762	0.047619	46	0.09	511.111	Herb	Exotic	Raphanus raphanistrum
UR2P1	URBAN	ASPHALT	10-20'	64	29	7	0.241379	22	0.758621	28	1	0	0.965517	0	64	0.09	711.111	Herb	Exotic	Verbena bonariensis
UR2P1	URBAN	ASPHALT	0-10'	44	17	3	0.176471	14	0.823529	14	0	3	0.823529	0.176471	44	0.09	488.889	Herb	Native	Bidens macroptera
UR2P1	URBAN	ASPHALT	20-30'	114	38	6	0.157895	32	0.842105	33	2	3	0.868421	0.0789474	114	0.09	1266.67	Herb	Native	Solanum incanum
UR2P2	URBAN	ASPHALT	0-10'	60	30	6	0.2	24	0.8	26	1	3	0.866667	0.1	60	0.09	666.667	Herb	Native	Solanum nigrum
UR2P2	URBAN	ASPHALT	10-20'	33	21	6	0.285714	15	0.714286	21	0	0	1	0	33	0.09	366.667	Herb	Native	Sonchus asper
UR2P2	URBAN	ASPHALT	20-30'	51	18	1	0.0555556	17	0.944444	15	0	3	0.833333	0.166667	51	0.09	566.667	Herb	Native	Stellaria media
UR3P1	URBAN	ASPHALT	0-10'	42	31	8	0.258065	23	0.741935	30	1	0	0.967742	0	42	0.09	466.667	Herb	Native	Taraxacum officinale
UR3P1	URBAN	ASPHALT	10-20'	52	31	8	0.258065	23	0.741935	30	1	0	0.967742	0	52	0.09	577.778	Herb	Native	Trifolium ruppellianum
UR3P1	URBAN	ASPHALT	20-30'	176	53	9	0.169811	44	0.830189	48	2	3	0.90566	0.0566038	176	0.09	1955.56	Shrub	Native	Crotalaria agatiflora
UR3P2	URBAN	ASPHALT	20-30'	91	33	10	0.30303	23	0.69697	32	1	0	0.969697	0	91	0.09	1011.11	Herb	Native	Trifolium schimperi
UR3P2	URBAN	ASPHALT	0-10'	68	24	3	0.125	21	0.875	21	1	2	0.875	0.0833333	68	0.09	755.556	Tree	Native	Croton macrostachyus
RU1P1	RURAL	ASPHALT	0-10'	30	21	6	0.285714	15	0.714286	20	1	0	0.952381	0	30	0.09	333.333	Herb	Native	Pilea tetraphylla
RU1P1	RURAL	ASPHALT	20-30'	140	41	7	0.170732	34	0.829268	38	3	0	0.926829	0	140	0.09	1555.56	Herb	Native	Haplocarpha rueppellii
RU1P1	RURAL	ASPHALT	10-20'	85	37	10	0.27027	27	0.72973	32	2	3	0.864865	0.0810811	85	0.09	944.444	Herb	Native	Chenopodiastrum murale
RU1P2	RURAL	ASPHALT	20-30'	111	32	8	0.25	24	0.75	31	1	0	0.96875	0	111	0.09	1233.33	Herb	Exotic	Nicandra physalodes
RU1P2	RURAL	ASPHALT	0-10'	58	27	7	0.259259	20	0.740741	26	1	0	0.962963	0	58	0.09	644.444	Herb	Native	Helichrysum formosissimum
RU1P2	RURAL	ASPHALT	10-20'	76	35	8	0.228571	27	0.771429	32	1	2	0.914286	0.0571429	76	0.09	844.444	Herb	Native	Hypoestes forskaolii
RU2P1	RURAL	ASPHALT	0-10'	55	26	4	0.153846	22	0.846154	23	1	2	0.884615	0.0769231	55	0.09	611.111	Herb	Exotic	Bidens pilosa
RU2P1	RURAL	ASPHALT	20-30'	186	38	10	0.263158	28	0.736842	38	0	0	1	0	186	0.09	2066.67	Herb	Exotic	Oxalis corniculata
RU2P1	RURAL	ASPHALT	10-20'	45	21	6	0.285714	15	0.714286	20	1	0	0.952381	0	45	0.09	500	Herb	Native	Impatiens ethiopica
RU2P2	RURAL	ASPHALT	0-10'	60	32	9	0.28125	23	0.71875	31	1	0	0.96875	0	60	0.09	666.667	Herb	Exotic	Cyclospermum leptophyllum
RU2P2	RURAL	ASPHALT	20-30'	407	68	14	0.205882	54	0.794118	62	3	3	0.911765	0.0441176	407	0.09	4522.22	Herb	Native	Digitaria abyssinica
RU3P1	RURAL	ASPHALT	10-20'	57	20	3	0.15	17	0.85	18	2	0	0.9	0	57	0.09	633.333	Herb	Exotic	Datura stramonium
RU3P1	RURAL	ASPHALT	0-10'	41	20	4	0.2	16	0.8	19	1	0	0.95	0	41	0.09	455.556	Herb	Native	Kickxia elatine subsp. crinita
RU3P1	RURAL	ASPHALT	20-30'	174	46	9	0.195652	37	0.804348	42	2	2	0.913043	0.0434783	174	0.09	1933.33	Herb	Native	Lamium amplexicaule
RU3P2	RURAL	ASPHALT	20-30'	139	42	7	0.166667	35	0.833333	38	2	2	0.904762	0.047619	139	0.09	1544.44	Herb	Exotic	Euphorbia hirta
RU3P2	RURAL	ASPHALT	0-10'	25	14	4	0.285714	10	0.714286	13	0	1	0.928571	0.0714286	25	0.09	277.778	Herb	Native	Polygonum persicaria
RU3P2	RURAL	ASPHALT	10-20'	63	22	5	0.227273	17	0.772727	19	2	1	0.863636	0.0454545	63	0.09	700	Herb	Native	Pseudognaphalium luteoalbum
RU3P2	RURAL	ASPHALT	10-20'	162	48	9	0.1875	39	0.8125	43	2	3	0.895833	0.0625	162	0.09	1800	Shrub	Native	Vernonia amygdalina
UR1P1	URBAN	GRAVEL	0-10'	47	22	6	0.272727	16	0.727273	21	1	0	0.954545	0	47	0.09	522.222	Herb	Exotic	Torilis arvensis
UR1P1	URBAN	GRAVEL	10-20'	64	28	4	0.142857	24	0.857143	26	2	0	0.928571	0	64	0.09	711.111	Herb	Native	Verbascum sinaiticum
UR1P1	URBAN	GRAVEL	20-30'	70	35	6	0.171429	29	0.828571	32	0	3	0.914286	0.0857143	70	0.09	777.778	Herb	Native	Verbena officinalis
UR1P2	URBAN	GRAVEL	0-10'	31	21	4	0.190476	17	0.809524	20	1	0	0.952381	0	31	0.09	344.444	Herb	Native	Veronica abyssinica
UR1P2	URBAN	GRAVEL	10-20'	30	18	4	0.222222	14	0.777778	16	2	0	0.888889	0	30	0.09	333.333	Herb	Native	Diplotaxis erucoides
UR1P2	URBAN	GRAVEL	20-30'	74	30	7	0.233333	23	0.766667	29	0	1	0.966667	0.0333333	74	0.09	822.222	Herb	Native	Drymaria cordata
UR2P1	URBAN	GRAVEL	0-10'	47	22	7	0.318182	15	0.681818	21	1	0	0.954545	0	47	0.09	522.222	Herb	Native	Dysphania multifida
UR2P1	URBAN	GRAVEL	20-30'	68	27	5	0.185185	22	0.814815	26	1	0	0.962963	0	68	0.09	755.556	Herb	Native	Galinsoga quadriradiata
UR2P2	URBAN	GRAVEL	0-10'	47	26	5	0.192308	21	0.807692	24	0	2	0.923077	0.0769231	47	0.09	522.222	Herb	Native	Galium aparine
UR2P2	URBAN	GRAVEL	10-20'	34	21	6	0.285714	15	0.714286	21	0	0	1	0	34	0.09	377.778	Herb	Native	Geranium arabicum
UR2P2	URBAN	GRAVEL	20-30'	99	26	5	0.192308	21	0.807692	24	0	2	0.923077	0.0769231	99	0.09	1100	Herb	Native	Guizotia scabra
UR3P1	URBAN	GRAVEL	0-10'	49	20	7	0.35	13	0.65	20	0	0	1	0	49	0.09	544.444	Herb	Native	Lysimachia arvensis
UR3P1	URBAN	GRAVEL	10-20'	35	18	3	0.166667	15	0.833333	16	1	1	0.888889	0.0555556	35	0.09	388.889	Herb	Native	Medicago polymorpha
UR3P1	URBAN	GRAVEL	20-30'	70	22	6	0.272727	16	0.727273	21	1	0	0.954545	0	70	0.09	777.778	Herb	Native	Nasturtium officinale
UR3P2	URBAN	GRAVEL	10-20'	45	22	6	0.272727	16	0.727273	21	1	0	0.954545	0	45	0.09	500	Herb	Exotic	Tagetes minuta
UR3P2	URBAN	GRAVEL	0-10'	48	20	3	0.15	17	0.85	17	1	2	0.85	0.1	48	0.09	533.333	Herb	Native	Oldenlandia monanthos
UR3P2	URBAN	GRAVEL	20-30'	101	47	9	0.191489	38	0.808511	41	2	4	0.87234	0.0851064	101	0.09	1122.22	Herb	Native	Persicaria nepalensis
UR3P2	URBAN	GRAVEL	10-20'	65	29	5	0.172414	24	0.827586	27	1	1	0.931034	0.0344828	65	0.09	722.222	Tree	Native	Juniperus procera Hochst. ex Endl.
RU1P1	RURAL	GRAVEL	0-10'	41	24	5	0.208333	19	0.791667	23	1	0	0.958333	0	41	0.09	455.556	Herb	Native	Rumex nepalensis
RU1P1	RURAL	GRAVEL	10-20'	38	21	2	0.0952381	19	0.904762	20	1	0	0.952381	0	38	0.09	422.222	Herb	Native	Snowdenia polystachya
RU1P1	RURAL	GRAVEL	20-30'	182	42	7	0.166667	35	0.833333	41	1	0	0.97619	0	182	0.09	2022.22	Herb	Native	Solanum anguivi
RU1P2	RURAL	GRAVEL	10-20'	59	25	3	0.12	22	0.88	22	2	1	0.88	0.04	59	0.09	655.556	Herb	Native	Poa annua
RU1P2	RURAL	GRAVEL	0-10'	64	20	2	0.1	18	0.9	16	1	3	0.8	0.15	64	0.09	711.111	Herb	Native	Solanum coagulans
RU1P2	RURAL	GRAVEL	20-30'	159	46	8	0.173913	38	0.826087	41	2	3	0.891304	0.0652174	159	0.09	1766.67	Herb	Native	Chenopodium album
RU2P1	RURAL	GRAVEL	20-30'	96	31	5	0.16129	26	0.83871	30	1	0	0.967742	0	96	0.09	1066.67	Herb	Exotic	Argemone mexicana
RU2P1	RURAL	GRAVEL	0-10'	62	28	6	0.214286	22	0.785714	26	2	0	0.928571	0	62	0.09	688.889	Herb	Native	Chlorophytum tetraphyllum
RU2P1	RURAL	GRAVEL	10-20'	48	27	5	0.185185	22	0.814815	25	2	0	0.925926	0	48	0.09	533.333	Herb	Native	Commelina africana
RU2P2	RURAL	GRAVEL	10-20'	99	32	5	0.15625	27	0.84375	29	2	1	0.90625	0.03125	99	0.09	1100	Herb	Exotic	Oenothera rosea
RU2P2	RURAL	GRAVEL	0-10'	69	28	7	0.25	21	0.75	26	2	0	0.928571	0	69	0.09	766.667	Herb	Native	Crassocephalum crepidioides
RU2P2	RURAL	GRAVEL	20-30'	136	39	8	0.205128	31	0.794872	36	1	2	0.923077	0.0512821	136	0.09	1511.11	Herb	Native	Crassocephalum picridifolium
RU2P2	RURAL	GRAVEL	10-20'	46	25	7	0.28	18	0.72	25	0	0	1	0	46	0.09	511.111	Shrub	Native	Pavonia schimperiana
RU3P1	RURAL	GRAVEL	20-30'	122	43	8	0.186047	35	0.813953	40	1	2	0.930233	0.0465116	122	0.09	1355.56	Tree	Exotic	Olea europaea L.
RU3P1	RURAL	GRAVEL	0-10'	54	27	7	0.259259	20	0.740741	27	0	0	1	0	54	0.09	600	Herb	Native	Cynoglossum amplifolium
RU3P1	RURAL	GRAVEL	10-20'	75	30	7	0.233333	23	0.766667	27	1	2	0.9	0.0666667	75	0.09	833.333	Herb	Native	Dichondra repens
RU3P2	RURAL	GRAVEL	20-30'	125	40	7	0.175	33	0.825	37	2	1	0.925	0.025	125	0.09	1388.89	Herb	Native	Kalanchoe petitiana
RU3P2	RURAL	GRAVEL	0-10'	88	44	10	0.227273	34	0.772727	41	1	2	0.931818	0.0454545	88	0.09	977.778	Herb	Native	Dichrocephala integrifolia
